29. Toumpanakis D, Kastis GA, Zacharatos P, Sigala I, Michailidou T, Kouvela M, Glynos C, Divangahi M, Roussos C, Theocharis SE, Vassilakopoulos T: Inspiratory resistive breathing induces acute lung injury. *Am J Respir Crit Care Med* 2010; 182:1129–36
30. Laffey JG, Madotto F, Bellani G, Pham T, Fan E, Brochard L, Amin P, Arabi Y, Bajwa EK, Bruhn A, Cerny V, Clarkson K, Heunks L, Kurahashi K, Laake JH, Lorente JA, McNamee L, Nin N, Palo JE, Piquilloud L, Qiu H, Jiménez JIS, Esteban A, McAuley DF, van Haren F, Ranieri M, Rubenfeld G, Wrigge H, Slutsky AS, Pesenti A; LUNG SAFE Investigators; ESICM Trials Group: Geo-economic variations in epidemiology, patterns of care, and outcomes in patients with acute respiratory distress syndrome: Insights from the LUNG SAFE prospective cohort study. *Lancet Respir Med* 2017; 5:627–38

## ANESTHESIOLOGY REFLECTIONS FROM THE WOOD LIBRARY-MUSEUM

# The Appearance and Disappearance of Dr. Edwin J. Thompson, Lynn's Celebrated Administrator of Nitrous Oxide

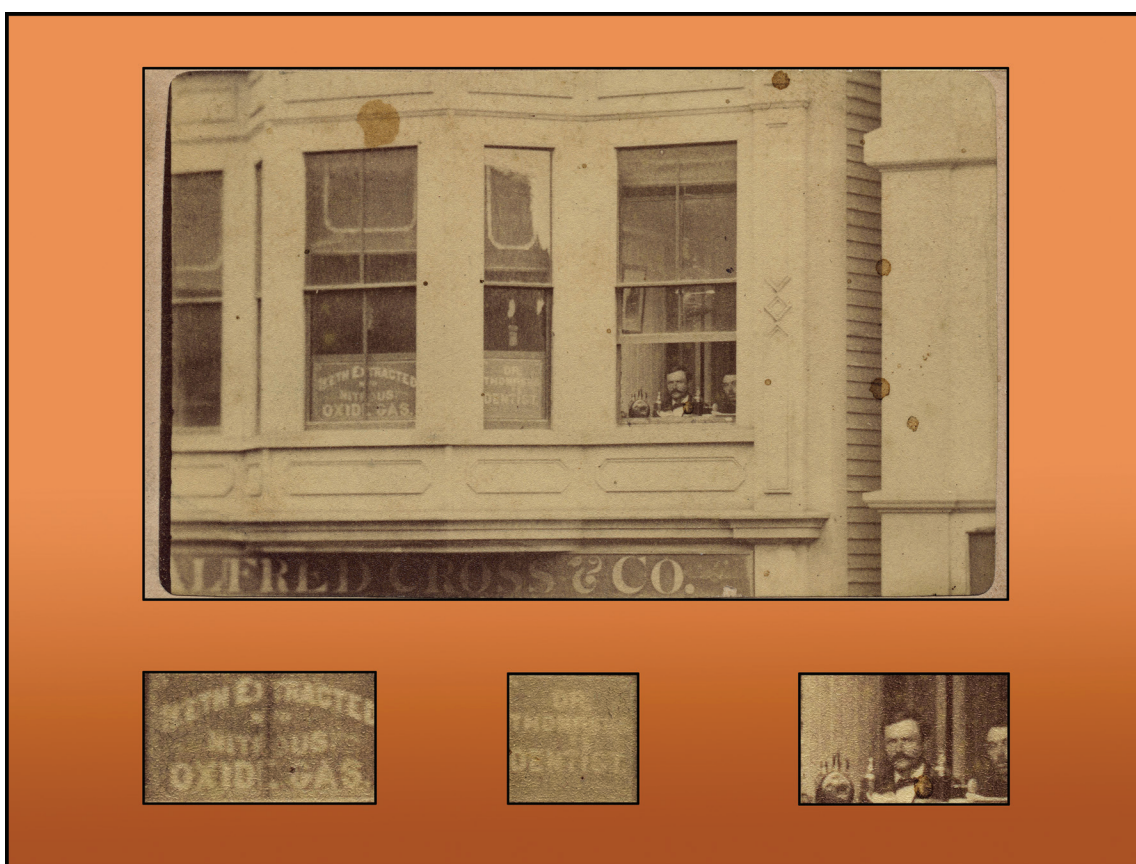

In 1879, I. A. Collins glued a copy of his cabinet photograph (*upper*) of a dental office in Lynn, Massachusetts, to an advertising card for dentist Edwin J. Thompson (ca. 1842 to 1912). Above the firm of Alfred Cross & Co., Clothiers, the dentist placed signage in the second-floor bay windows reading, “Teeth Extracted with Nitrous Oxide Gas” (*lower left*) by “Dr. Thompson Dentist” (*lower middle*). Through the open flanking window (*lower right*), photographer Collins may have captured the fleeting appearances of Dr. Thompson himself and an assistant gazing through the glazing. In 1912, the citizens of Lynn gazed one last time at Dr. Thompson before the then 70-yr-old dentist disappeared while fishing for salmon in Newfoundland. (Copyright © the American Society of Anesthesiologists’ Wood Library-Museum of Anesthesiology.)

*George S. Bause, M.D., M.P.H., Honorary Curator and Laureate of the History of Anesthesia, Wood Library-Museum of Anesthesiology, Schaumburg, Illinois, and Clinical Associate Professor, Case Western Reserve University, Cleveland, Ohio. UJYC@aol.com.*
